# Supplementary material
Source: Springer Nature journal article supplement (https://www.springermedizin.de/resource/supplementary/13054_2011_9900_MOESM5_ESM.pdf/9708440)

Controls

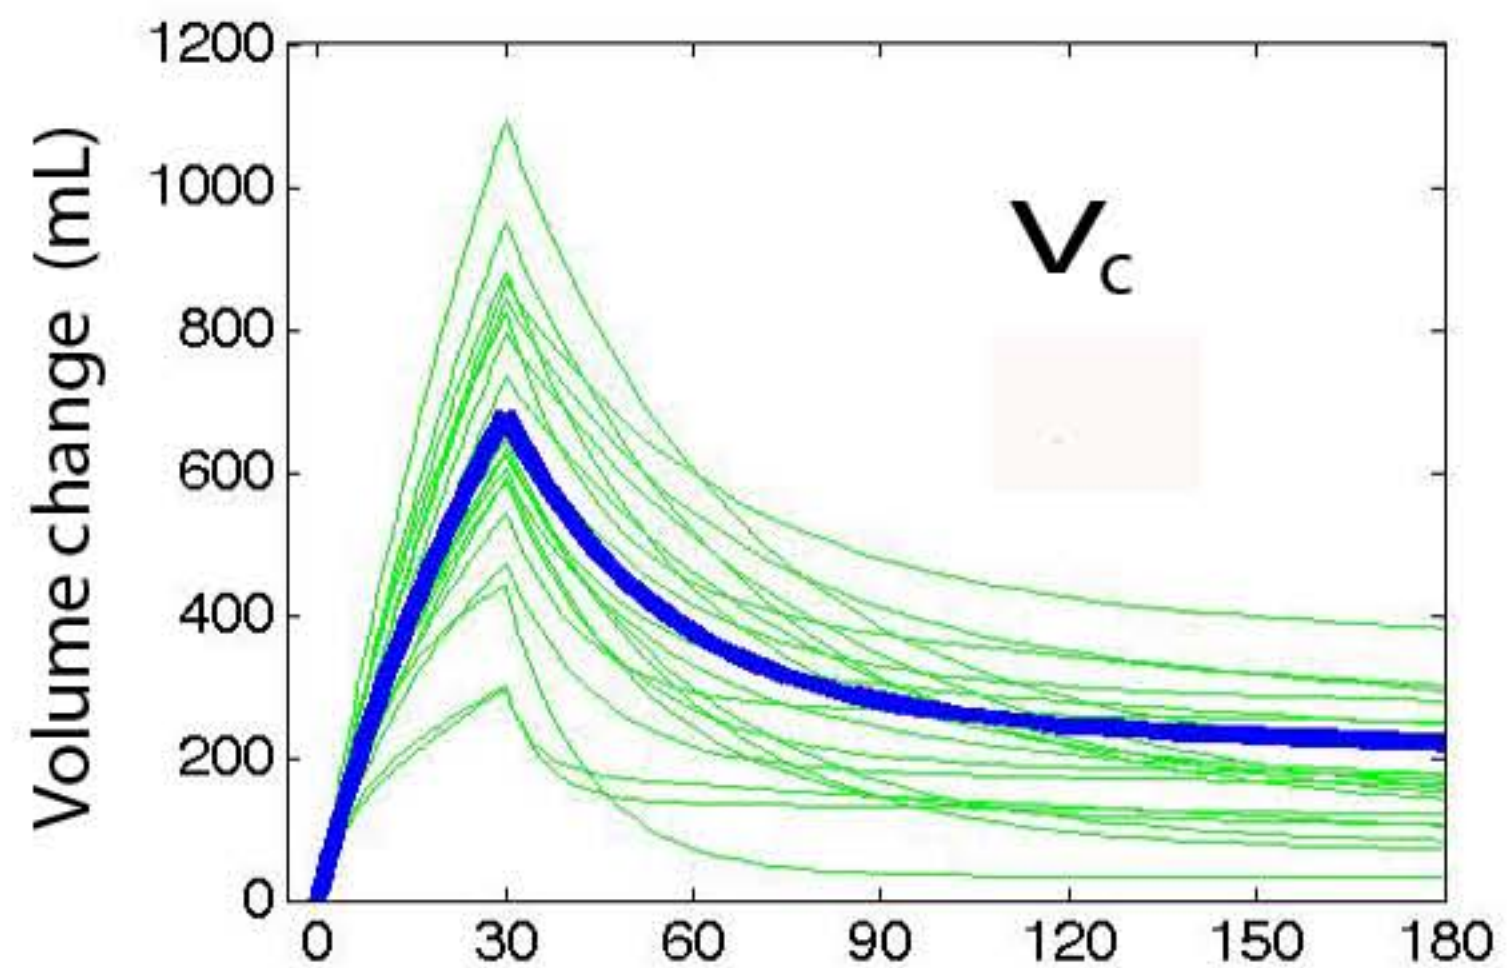

Esmolol

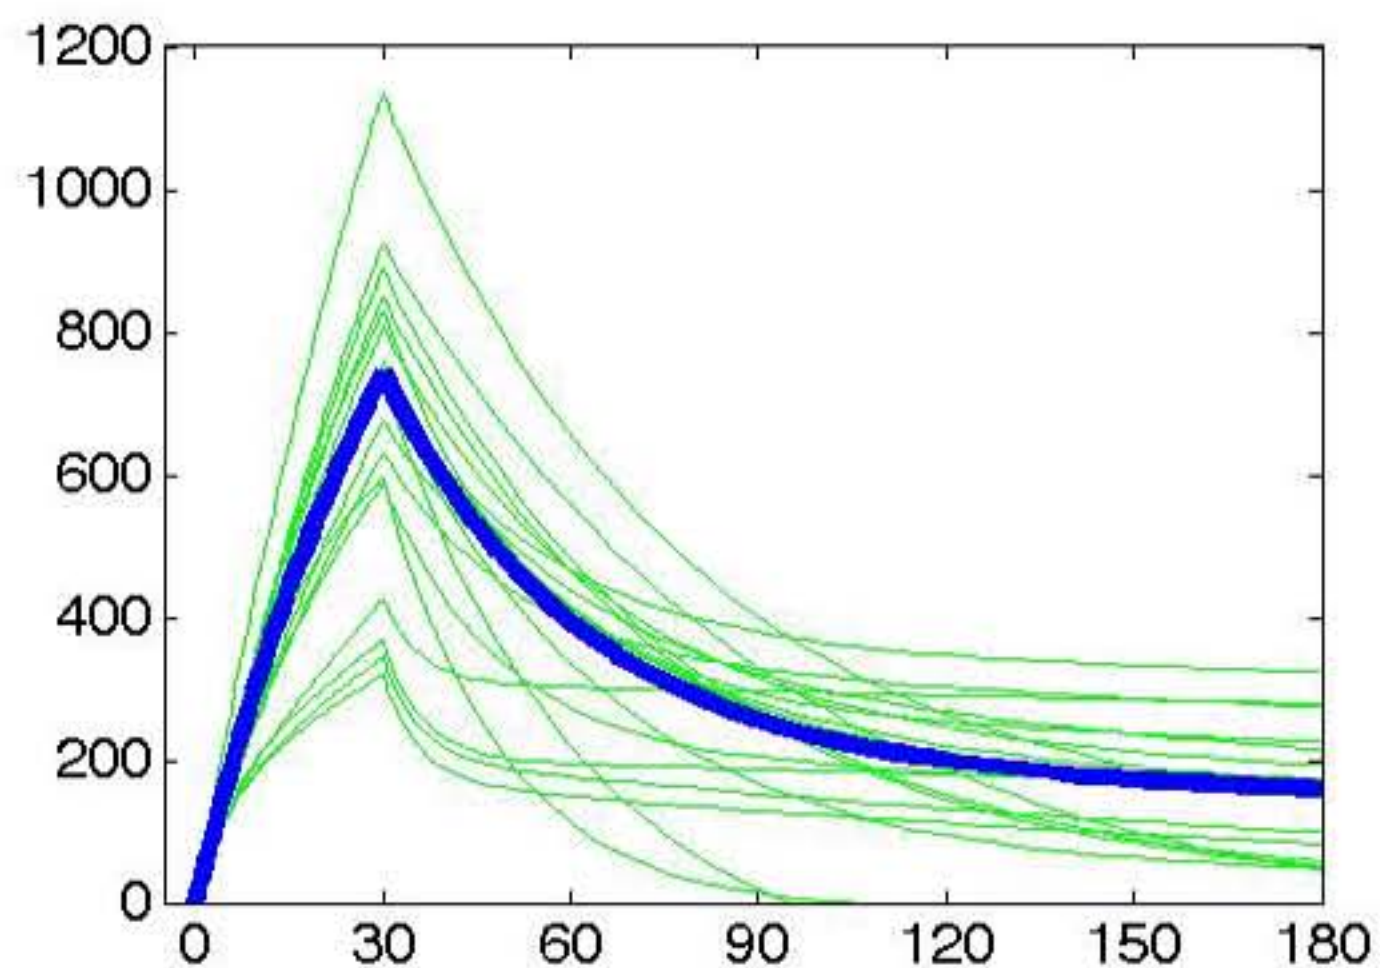

Phenylephrine

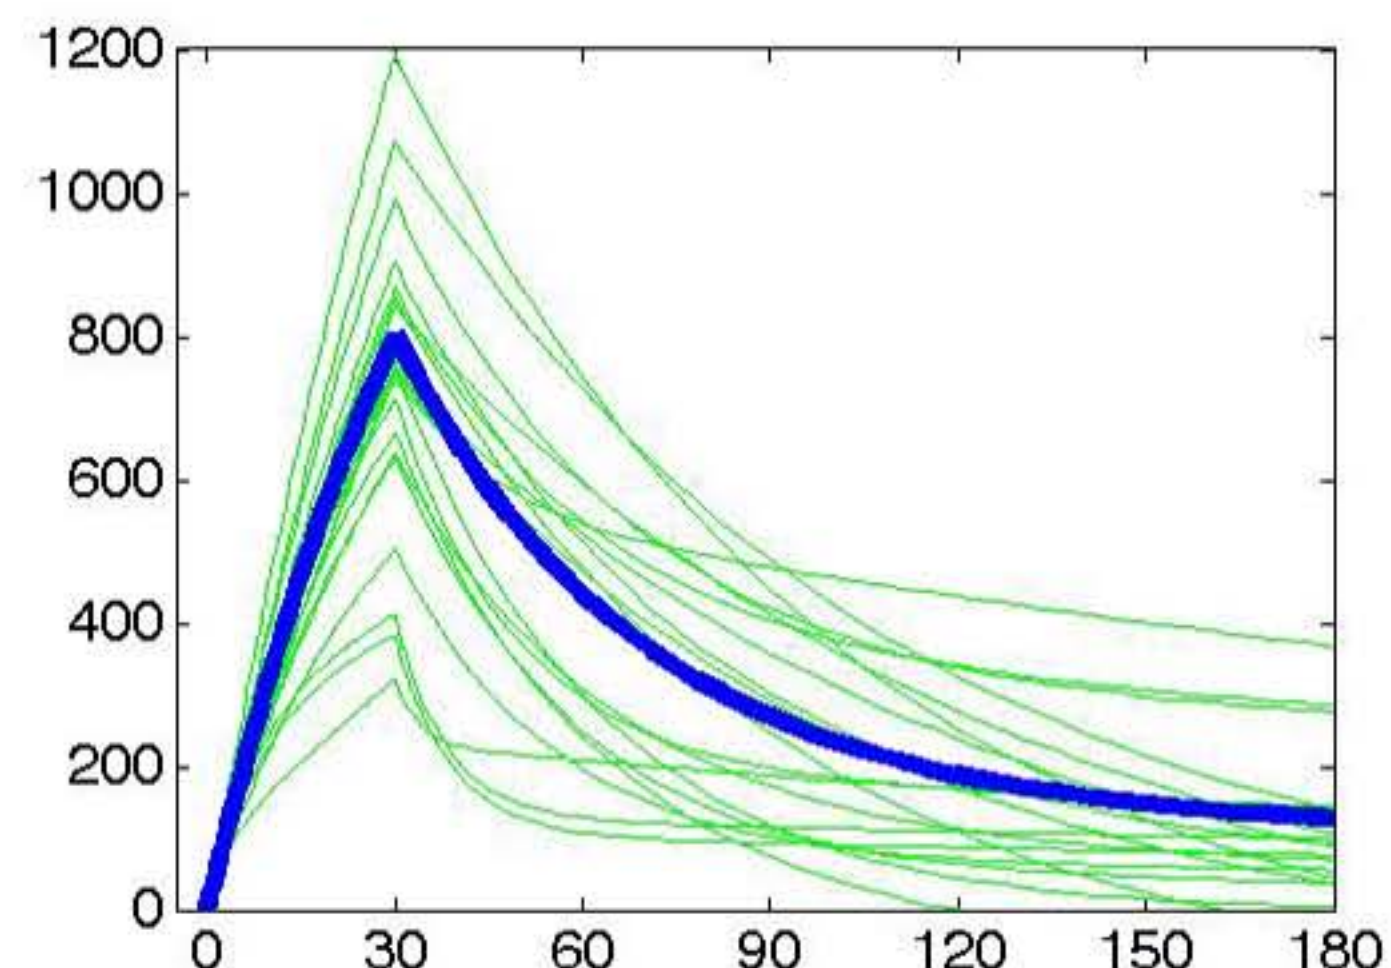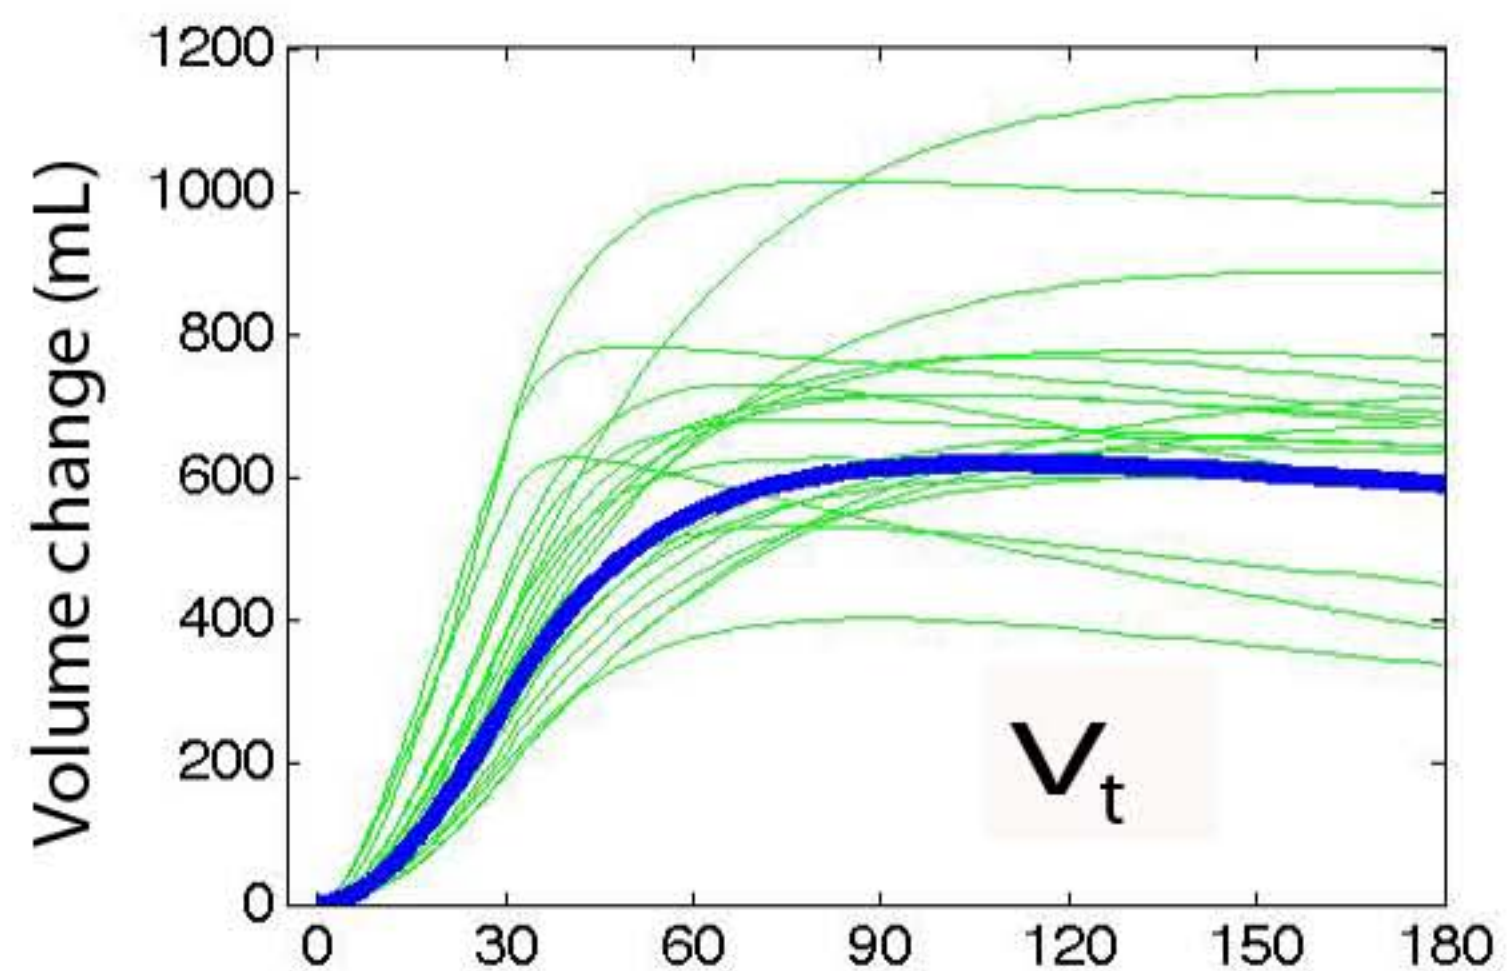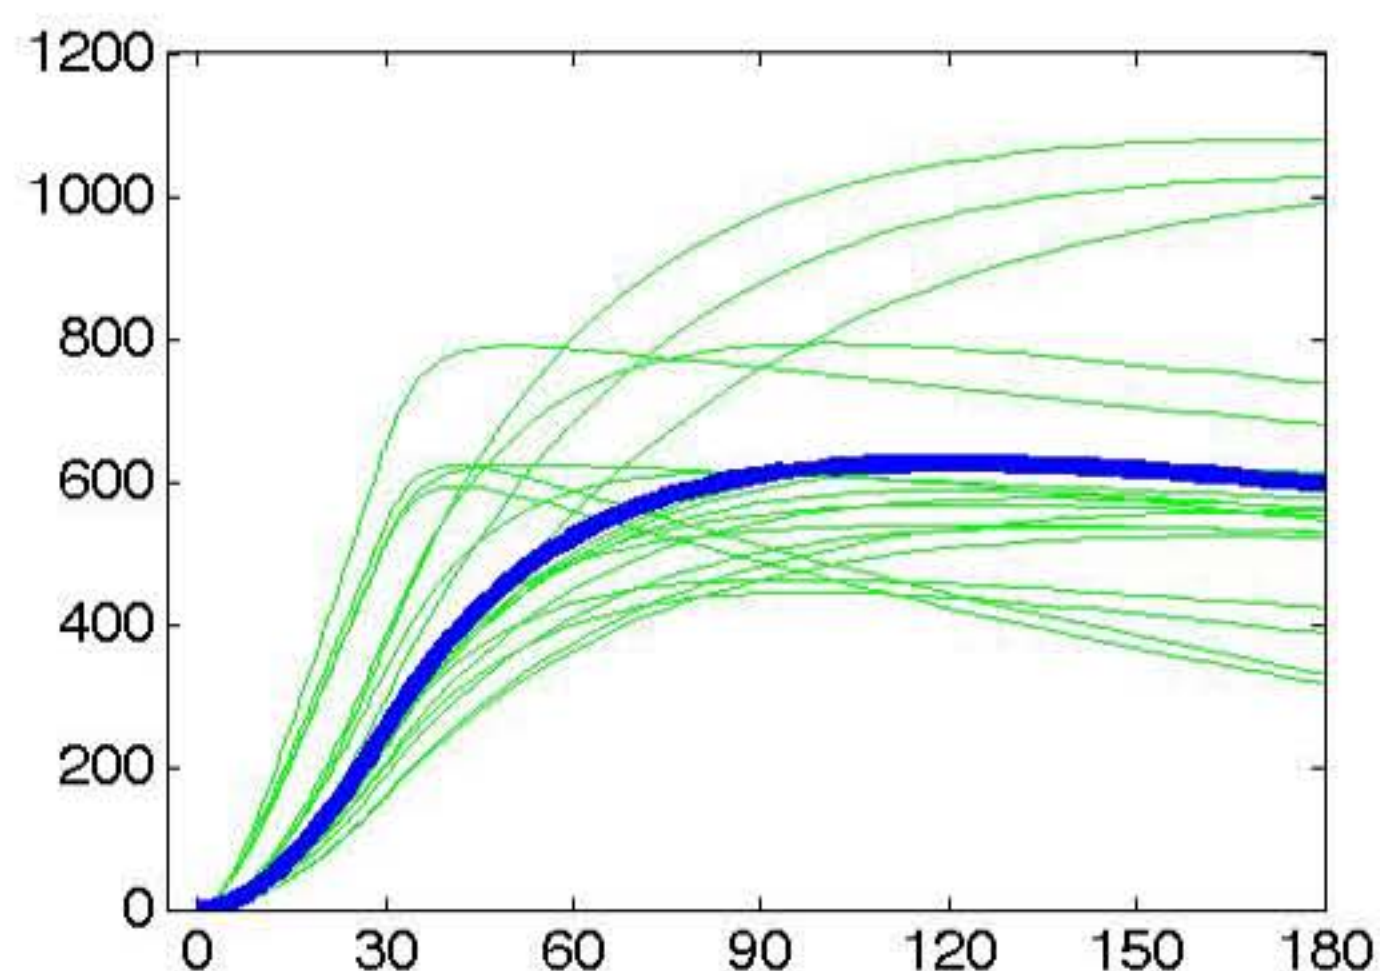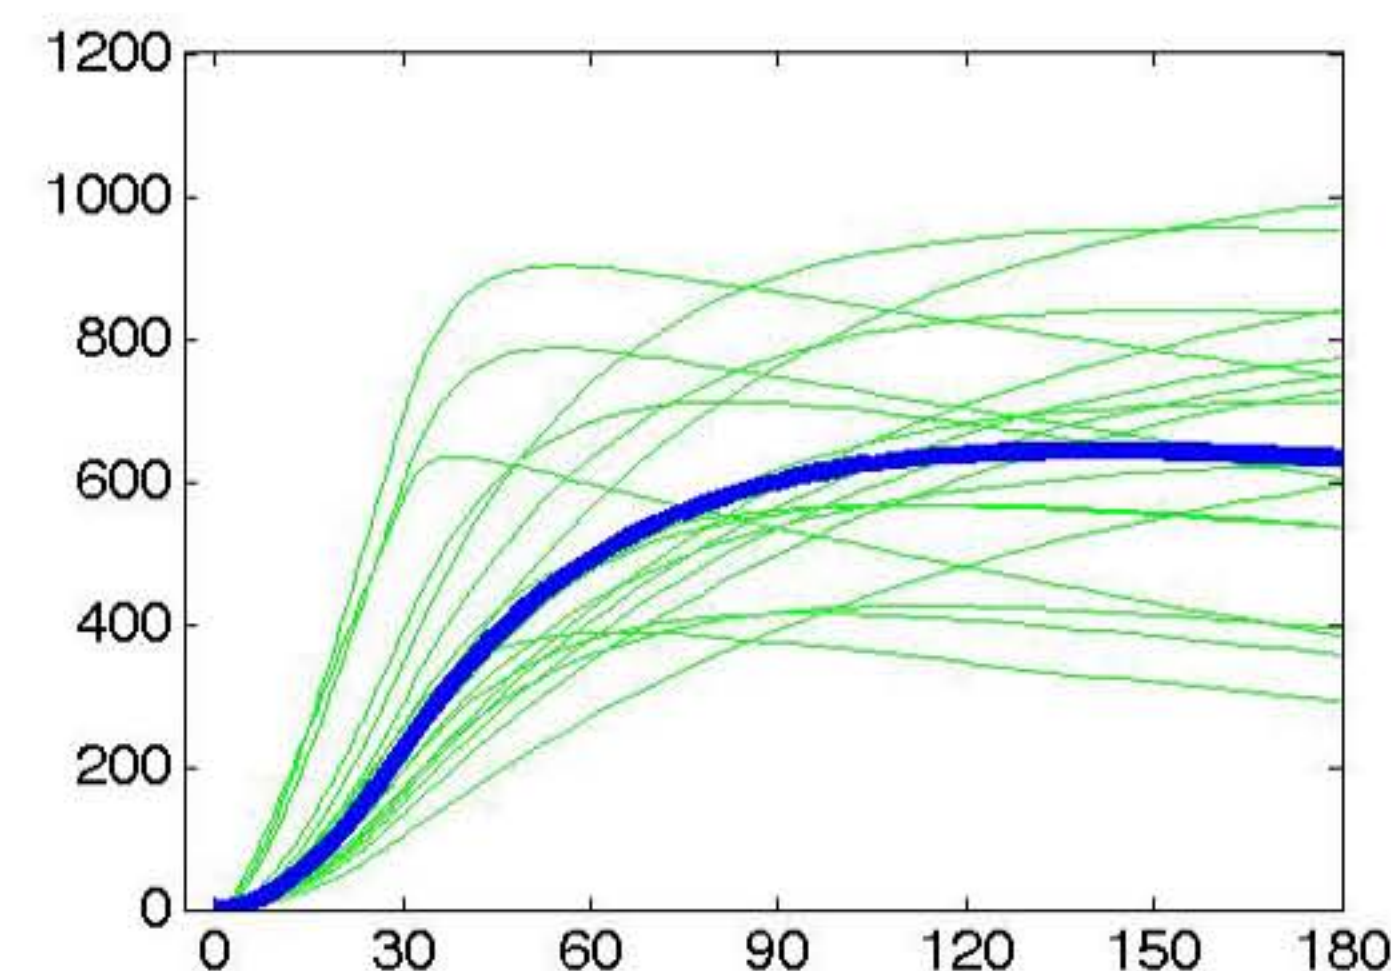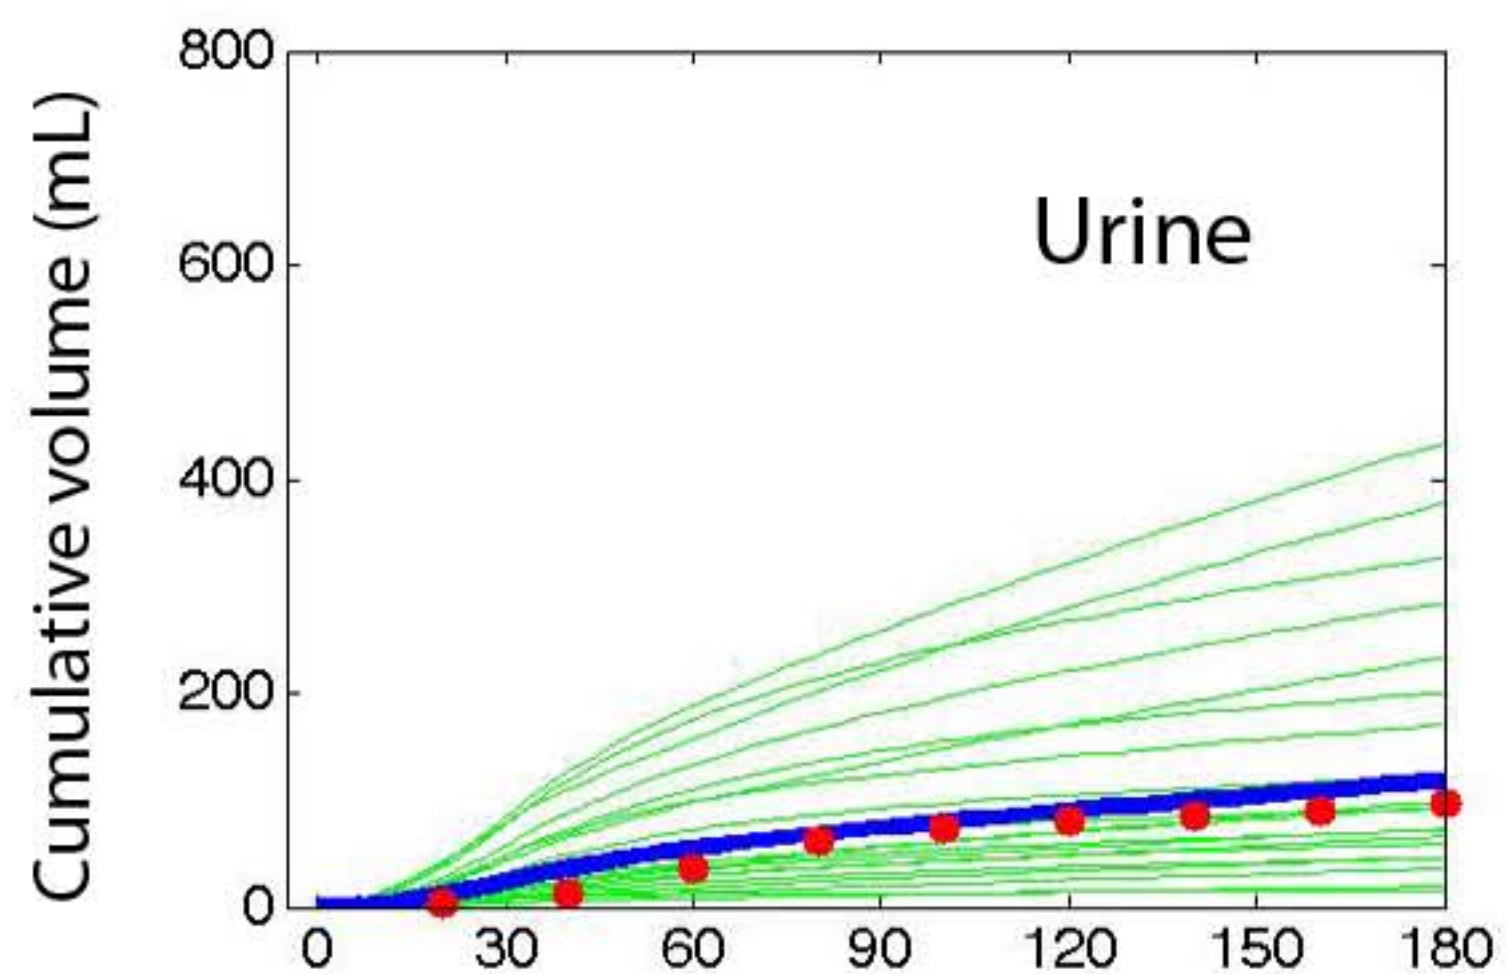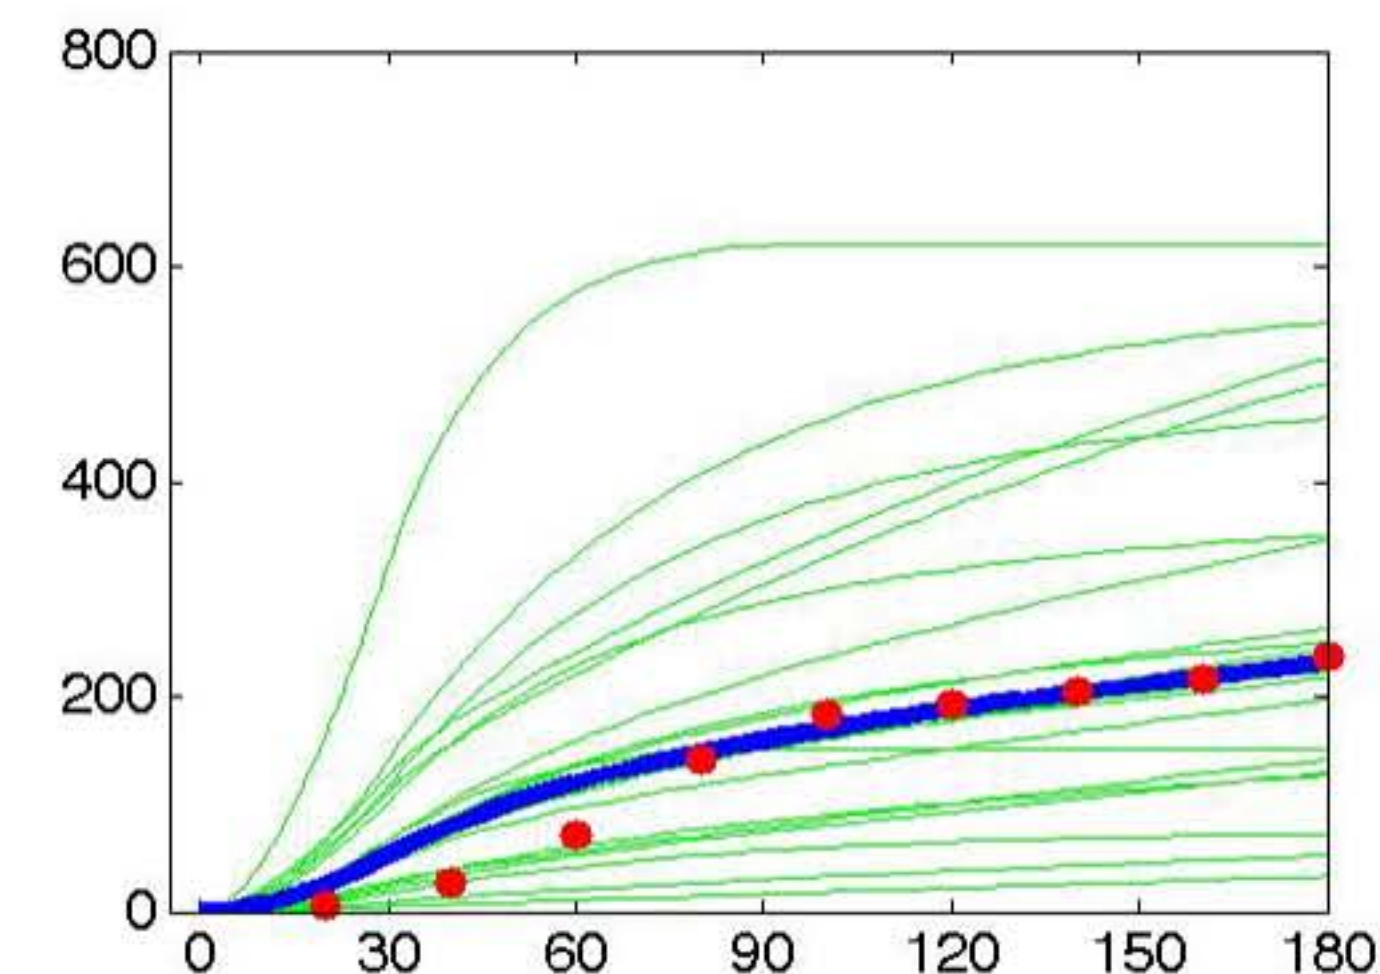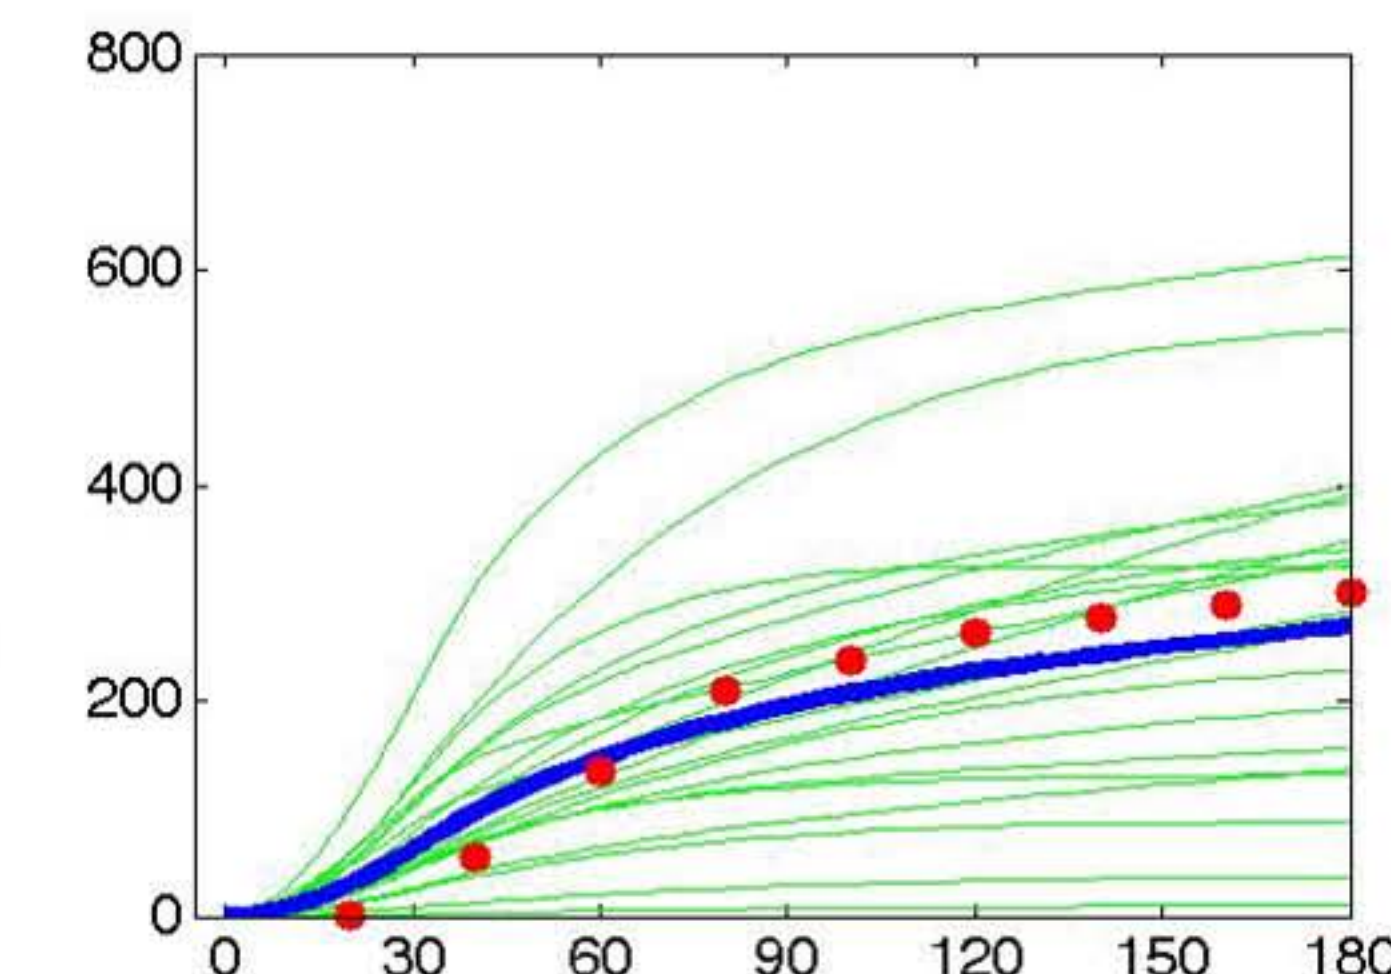

Time (min)

Supplement: MOESM5 [file 9708440]
